# Supplementary material for: Study on the Residence Time and Texture Prediction of Pea Protein Extrusion Based on Image Analysis
Source: MDPI journal article supplement (doi:10.3390/foods12244408), 2023-12-07
Supplement: s1 [file s1]

# Supplementary File

**Table S1:**

**Table S1. PSO/GA-BP Neural Network Prediction of Texture Characteristic Error**

| Texture Characteristics | Algorithm |   | MAE     | MSE      | RMSE    | MAPE      |
|-------------------------|-----------|---|---------|----------|---------|-----------|
| Hardness                | PSO       | A | 13.7506 | 271.2393 | 16.4693 | 19.2860%  |
|                         |           | B | 8.2494  | 109.4865 | 10.4636 | 11.6206 % |
|                         | GA        | A | 9.9642  | 177.0484 | 13.3060 | 13.6932 % |
|                         |           | B | 7.1850  | 88.2578  | 9.3946  | 10.5262 % |
| Resilience              | PSO       | A | 2.2198  | 7.3889   | 2.7183  | 7.2309 %  |
|                         |           | B | 1.4304  | 3.4231   | 1.8502  | 4.6031 %  |
|                         | GA        | A | 1.9160  | 5.6788   | 2.3830  | 6.0788 %  |
|                         |           | B | 1.7344  | 4.3140   | 2.0770  | 5.6107 %  |
| Chewiness               | PSO       | A | 9.3944  | 136.6132 | 11.6882 | 19.2639 % |
|                         |           | B | 5.6697  | 49.1289  | 7.0092  | 12.2022 % |
|                         | GA        | A | 13.0594 | 218.4931 | 14.7815 | 27.6970 % |
|                         |           | B | 5.7408  | 64.5064  | 8.0316  | 12.2837 % |

Note: A represents before optimization; B represents after optimization.
